# Supplementary material
Source: MDPI journal article supplement (https://www.mdpi.com/2304-6740/10/8/117)
Supplement: s1 [file s1]

## Supplementary Materials

# Chiral Selectors in Voltammetric Sensors Based on the Mixed Phenylalanine/Alanine Cu(II) and Zn(II) Complexes

Rufina A. Zilberg\*, Tatyana V. Berestova\*, Ruslan R. Gizatov, Yulia B. Teres, Miras N. Galimov, Elena O. Bulysheva

**Citation:** Zilberg, R.A.; Berestova, T.V.; Gizatov, R.R.; Teres, Y.B.; Galimov, M.N.; Bulysheva, E.O.

Chiral Selectors in Voltammetric Sensors Based on Mixed Phenylalanine/Alanine Cu(II) and Zn(II) Complexes. *Inorganics* **2022**, *10*, 117. <https://doi.org/10.3390/inorganics10080117>

Department of Chemistry, Bashkir State University, Ufa, 450000, Russian Federation

\*Correspondence: [zilbergra@yandex.ru](mailto:zilbergra@yandex.ru), [berestovatv@gmail.com](mailto:berestovatv@gmail.com)

Academic Editors: Izilda Aparecida Bagatin and Fábio Ruiz Simões

Received: 19 July 2022

Accepted: 9 August 2022

Published: 12 August 2022

**Publisher's Note:** MDPI stays neutral with regard to jurisdictional claims in published maps and institutional affiliations.

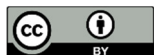

**Copyright:** © 2022 by the authors. Licensee MDPI, Basel, Switzerland. This article is an open access article distributed under the terms and conditions of the Creative Commons Attribution (CC BY) license (<https://creativecommons.org/licenses/by/4.0/>).

## S-1 ESI-MS of the Composites of the Copper(II) and Zinc(II) Complexes

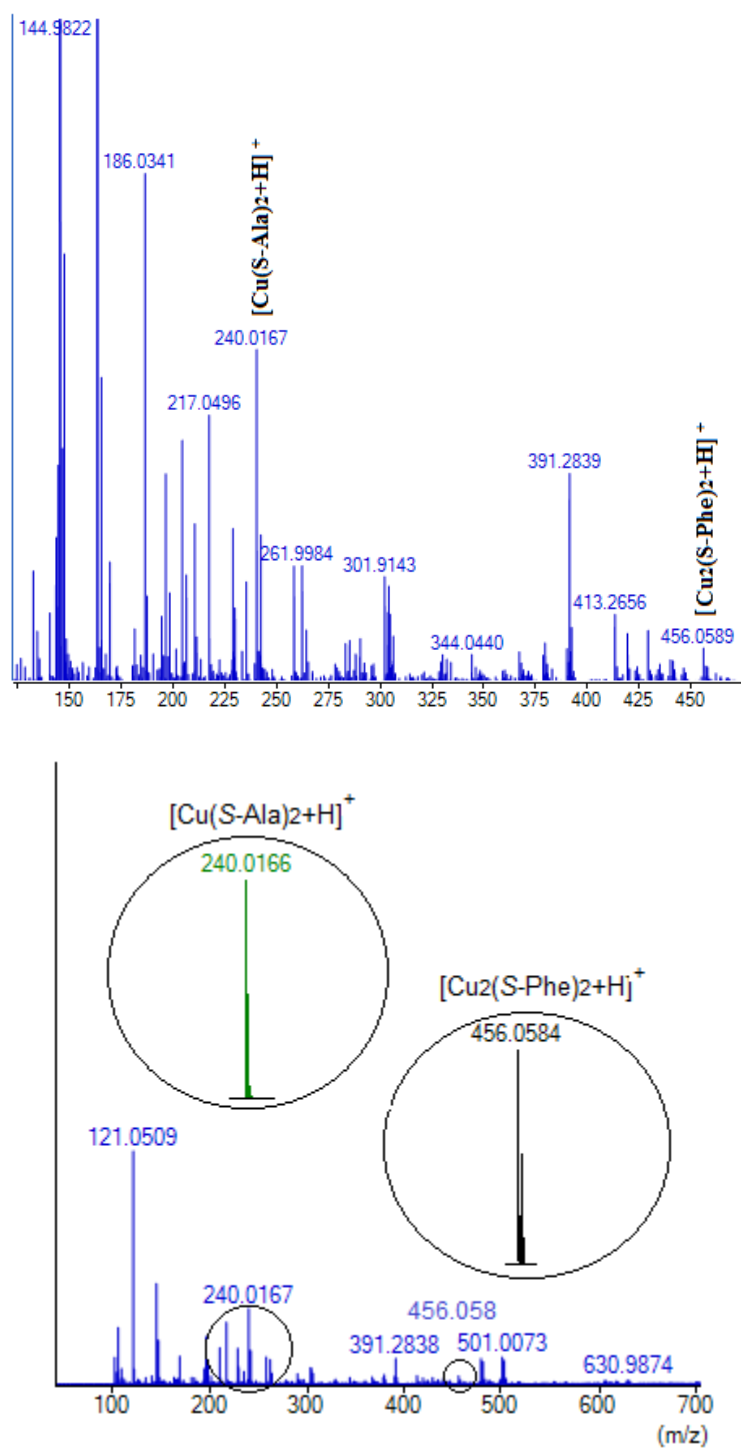

**Figure S1.** ESI-MS of the reaction mixture of composite  $[\text{Cu}(\text{S-Ala})_2] - [\text{Cu}(\text{S-Phe})_2]$  (1).

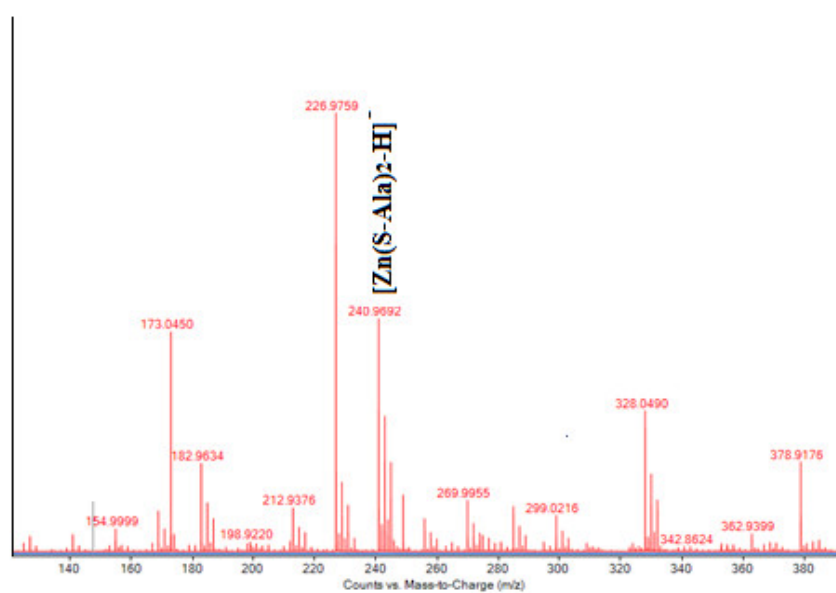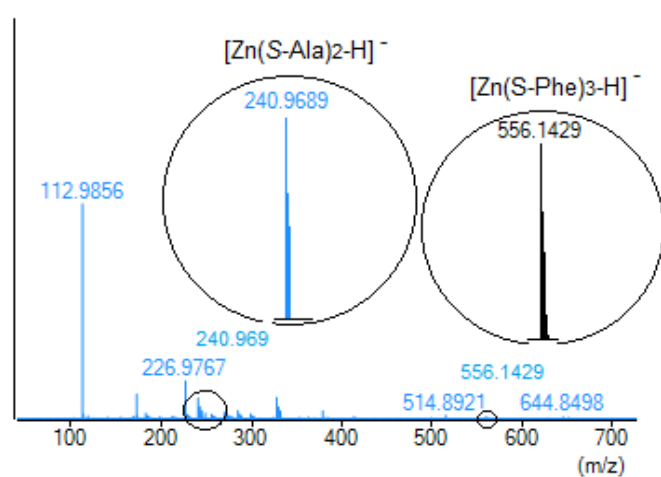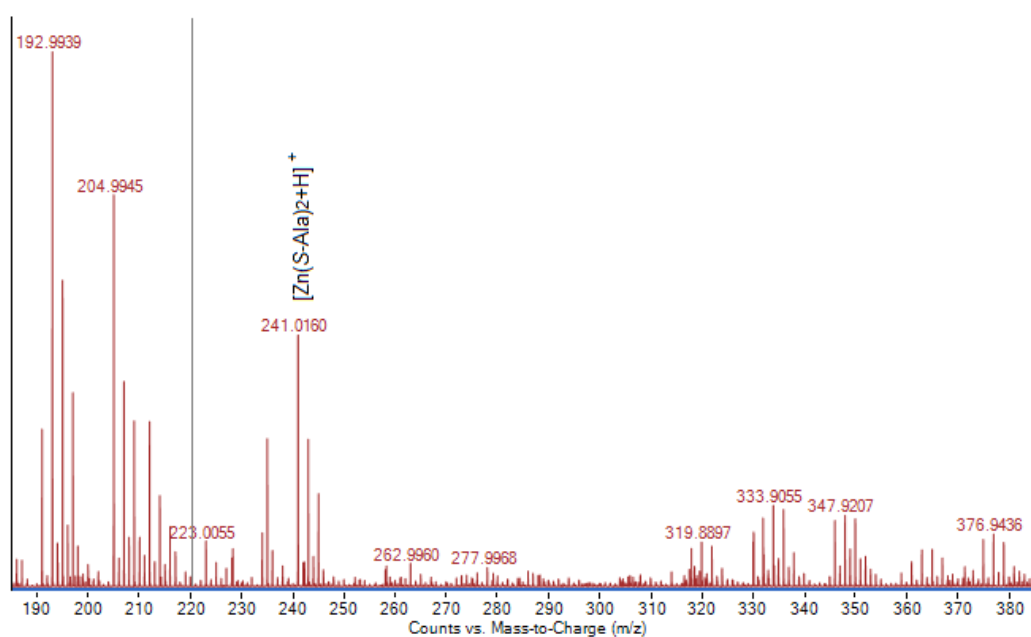

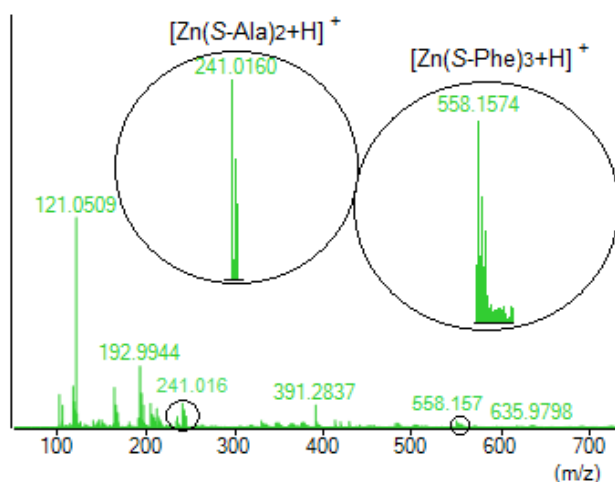

**Figure S2.** ESI-MS of the reaction mixture of composite  $[\text{Zn}(\text{S-Ala})_2(\text{H}_2\text{O})]$ - $[\text{Zn}(\text{S-Phe})_2(\text{H}_2\text{O})]$  (2).

## S-2 The structure of the Copper(II) and Zinc(II) Complexes

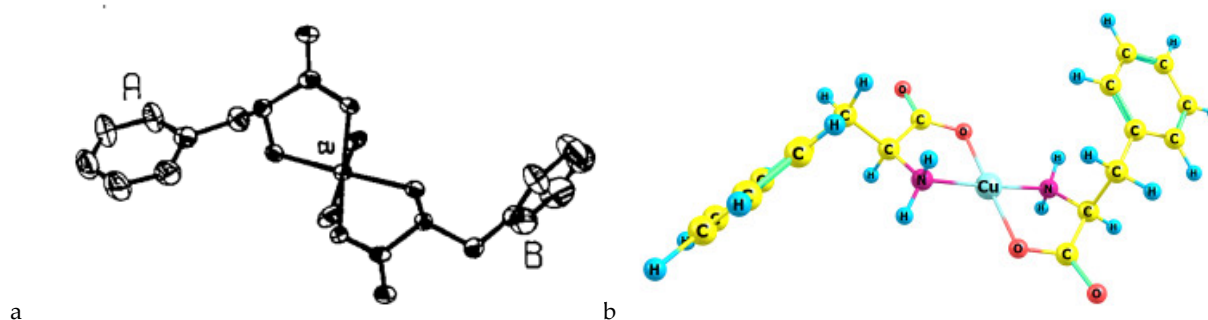

**Figure S3.** The structure of complex  $[\text{Cu}(\text{S-Phe})_2(\text{H}_2\text{O})]$  (1a) by X-Ray [34] (a), by DFT calculation (b).

### M06/6-311+G(d) (Solvent = Water)

#### Bis-*trans*- $[\text{Cu}(\text{S-Phe})_2]$ (1a) (*ta1-te1*)

|             |    |              |              |             |   |             |              |
|-------------|----|--------------|--------------|-------------|---|-------------|--------------|
| 0.316167000 | 6  | 3.322749000  | -1.658098000 | 1.720306000 | 6 | 4.524912000 | 0.057100000  |
| 0.113881000 | 1  | 3.699612000  | -2.592538000 | 2.483585000 | 1 | 3.756968000 | -0.066776000 |
| 1.267044000 | 1  | 2.834274000  | -1.914071000 | 1.920052000 | 6 | 5.559770000 | 0.963746000  |
| 0.631024000 | 6  | 2.274513000  | -1.086043000 | 2.836192000 | 1 | 5.596935000 | 1.549301000  |
| 0.942779000 | 6  | 1.154939000  | -2.079046000 | 0.952435000 | 6 | 6.543230000 | 1.120702000  |
| 1.099644000 | 8  | 1.423351000  | -3.272190000 | 1.106386000 | 1 | 7.355109000 | 1.827975000  |
| 1.068289000 | 8  | -0.023551000 | -1.590624000 | 0.214580000 | 6 | 6.485375000 | 0.366636000  |
| 0.785932000 | 29 | -0.190560000 | 0.344631000  | 0.975489000 | 1 | 7.254508000 | 0.481362000  |
| 0.505551000 | 8  | -0.385141000 | 2.293889000  | 0.410096000 | 6 | 5.449817000 | -0.536327000 |
| 0.443460000 | 6  | -1.598955000 | 2.701276000  | 1.324459000 | 1 | 5.410774000 | -1.128662000 |
| 0.243979000 | 8  | -1.933223000 | 3.871690000  | 0.555894000 | 6 | 4.457108000 | -0.704545000 |

|             |              |              |              |              |              |   |
|-------------|--------------|--------------|--------------|--------------|--------------|---|
| 1           | -4.326332000 | -3.263273000 | 7            | 1.696673000  | 0.177510000  | - |
| 1.383910000 |              |              | 0.137765000  |              |              |   |
| 6           | -5.959382000 | -1.973368000 | 7            | -2.123167000 | 0.482646000  | - |
| 0.841324000 |              |              | 1.306417000  |              |              |   |
| 1           | -6.694599000 | -2.774769000 | 6            | -2.673067000 | 1.624813000  | - |
| 0.831742000 |              |              | 0.559745000  |              |              |   |
| 6           | -6.343578000 | -0.669669000 | 1            | -3.552252000 | 2.040812000  | - |
| 0.544154000 |              |              | 1.067619000  |              |              |   |
| 1           | -7.381011000 | -0.449407000 | 6            | -3.056037000 | 1.194508000  |   |
| 0.302131000 |              |              | 0.858785000  |              |              |   |
| 6           | -5.405831000 | 0.352820000  | 1            | -2.146754000 | 0.874105000  |   |
| 0.560193000 |              |              | 1.386587000  |              |              |   |
| 1           | -5.708586000 | 1.374299000  | 1            | -3.441108000 | 2.079325000  |   |
| 0.330662000 |              |              | 1.379766000  |              |              |   |
| 1           | -2.654547000 | -0.370667000 | 6            | -4.071978000 | 0.091103000  |   |
| 1.129935000 |              |              | 0.874935000  |              |              |   |
| 1           | -2.174378000 | 0.661645000  | 6            | -3.696425000 | -1.219189000 |   |
| 2.308393000 |              |              | 1.164735000  |              |              |   |
| 1           | 1.654827000  | 0.163864000  | 1            | -2.655569000 | -1.433448000 |   |
| 0.882868000 |              |              | 1.408904000  |              |              |   |
| 1           | 2.286643000  | 0.969884000  | 6            | -4.633767000 | -2.246345000 |   |
| 0.385470000 |              |              | 1.150505000  |              |              |   |
| 1           | 2.745359000  | -0.866909000 | -1.600331000 |              |              |   |

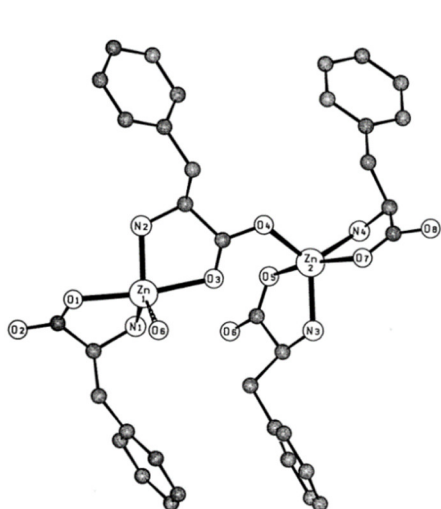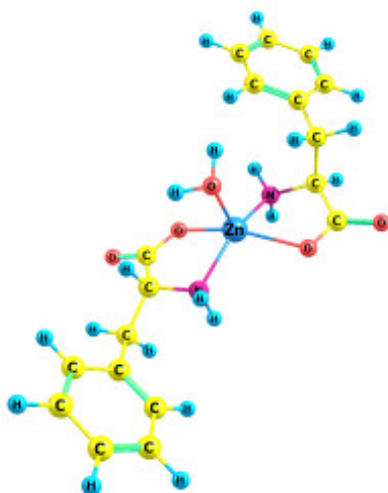

a b  
**Figure S4.** The structure of complex  $[\text{Zn}(\text{S-Phe})_2(\text{H}_2\text{O})]$  (**2a**) by X-Ray [35] (a), by DFT calculation (b).

#### M06/6-311+G(d) (Solvent = Water)

##### Bis-*trans*- $[\text{Zn}(\text{S-Phe})_2(\text{H}_2\text{O})]$ (**2a**) (*ta1-te1*)

|   |          |          |          |   |          |          |          |
|---|----------|----------|----------|---|----------|----------|----------|
| 1 | -7.53515 | -2.12543 | -0.26705 | 8 | -0.38297 | 2.08299  | 0.17733  |
| 6 | -6.7539  | -0.15108 | -0.62956 | 6 | -1.50763 | 2.48114  | -0.25159 |
| 1 | -7.58757 | 0.14926  | -1.26058 | 8 | -1.8336  | 3.66901  | -0.41436 |
| 6 | -5.72012 | 0.73956  | -0.37995 | 7 | -1.93046 | 0.11083  | -0.78056 |
| 1 | -5.7441  | 1.73818  | -0.81599 | 6 | -2.56564 | 1.41455  | -0.54644 |
| 1 | -2.59768 | -0.64992 | -0.65364 | 1 | -3.13586 | 1.73527  | -1.4288  |
| 1 | -1.61076 | 0.04809  | -1.7457  | 6 | -3.51355 | 1.33735  | 0.65391  |
| 6 | 3.91004  | -1.57748 | 3.64343  | 1 | -2.93634 | 1.0502   | 1.54398  |
| 1 | 3.30198  | -2.41951 | 3.97349  | 1 | -3.90399 | 2.34627  | 0.83259  |
| 6 | 4.5348   | -0.76235 | 4.58076  | 6 | -4.64499 | 0.37766  | 0.43274  |
| 1 | 4.41433  | -0.96701 | 5.64248  | 6 | -4.6303  | -0.89949 | 0.99025  |
| 6 | 5.31033  | 0.31078  | 4.16284  | 1 | -3.79873 | -1.19294 | 1.63153  |
| 1 | 5.80033  | 0.94947  | 4.89433  | 6 | -5.66294 | -1.79669 | 0.73992  |
| 6 | 5.45953  | 0.56248  | 2.80292  | 1 | -5.63521 | -2.79035 | 1.18165  |
| 1 | 6.06832  | 1.39945  | 2.46748  | 6 | -6.72623 | -1.42529 | -0.07138 |

|    |          |          |          |
|----|----------|----------|----------|
| 8  | 0.17168  | -2.08634 | -0.07337 |
| 7  | 1.8584   | -0.08471 | 0.47345  |
| 1  | 1.85213  | -0.14279 | 1.49399  |
| 1  | 2.54211  | 0.63484  | 0.24681  |
| 1  | 1.7651   | -1.6012  | 1.39742  |
| 30 | -0.22875 | -0.03962 | 0.42346  |
| 8  | -0.77191 | -0.27776 | 2.46001  |
| 1  | -1.64762 | -0.68218 | 2.51039  |
| 1  | -0.16029 | -0.90338 | 2.87002  |

|   |         |          |          |
|---|---------|----------|----------|
| 6 | 4.83602 | -0.25571 | 1.87121  |
| 1 | 4.95958 | -0.05935 | 0.80601  |
| 6 | 4.05628 | -1.33867 | 2.27908  |
| 6 | 3.37359 | -2.20688 | 1.26343  |
| 1 | 4.08702 | -2.50942 | 0.48931  |
| 1 | 3.0097  | -3.1272  | 1.74212  |
| 6 | 2.25286 | -1.51339 | 0.52887  |
| 6 | 1.25989 | -2.68316 | 0.14395  |
| 8 | 1.60356 | -3.85673 | -0.07562 |

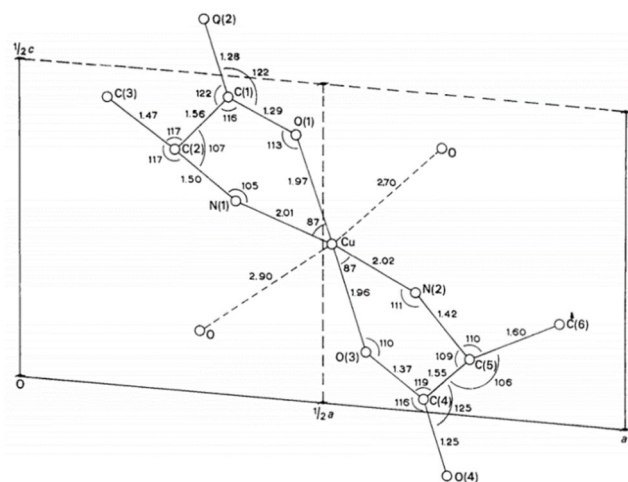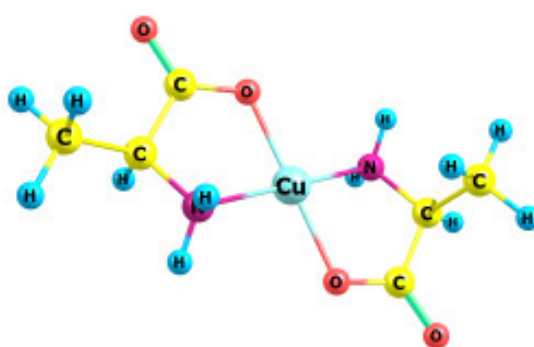

a b  
**Figure S5.** The structure of complex  $[\text{Cu}(\text{S-Ala})_2(\text{H}_2\text{O})]$  (**1b**) by X-Ray [33] (a), by DFT calculation (b).

#### M06/6-311+G(d) (Solvent = Water)

##### Bis-*trans*- $[\text{Cu}(\text{S-Ala})_2]$ (**1b**) (*ta-te*)

|   |          |          |          |
|---|----------|----------|----------|
| 1 | -1.12045 | 0.60907  | 1.46116  |
| 1 | -2.49005 | 1.72386  | 1.35983  |
| 1 | -1.0105  | -0.3602  | -1.18892 |
| 1 | -0.44635 | 0.8409   | -2.14882 |
| 1 | 2.86419  | 0.41045  | 1.6012   |
| 1 | 3.51032  | 1.42931  | 0.5001   |
| 1 | 4.23218  | -0.21224 | -0.89132 |
| 6 | 4.8808   | -1.02872 | 0.98513  |
| 1 | 4.45644  | -1.42594 | 1.91519  |
| 1 | 5.48923  | -1.81242 | 0.52664  |
| 1 | 5.54134  | -0.1934  | 1.23915  |
| 1 | -2.60076 | 0.09931  | 0.58626  |

|    |          |          |          |
|----|----------|----------|----------|
| 6  | 3.78873  | -0.57153 | 0.04796  |
| 6  | 2.83653  | -1.69109 | -0.36691 |
| 8  | 3.26889  | -2.83556 | -0.52116 |
| 8  | 1.61719  | -1.35324 | -0.57815 |
| 29 | 1.21849  | 0.55597  | -0.28044 |
| 8  | 0.75313  | 2.45545  | 0.07881  |
| 6  | -0.49326 | 2.71878  | -0.05608 |
| 8  | -1.00543 | 3.81896  | 0.16591  |
| 7  | 3.00309  | 0.55185  | 0.5994   |
| 7  | -0.56631 | 0.55843  | -1.17699 |
| 6  | -1.38307 | 1.548    | -0.45771 |
| 1  | -2.20513 | 1.91497  | -1.08524 |
| 6  | -1.95483 | 0.93206  | 0.82229  |

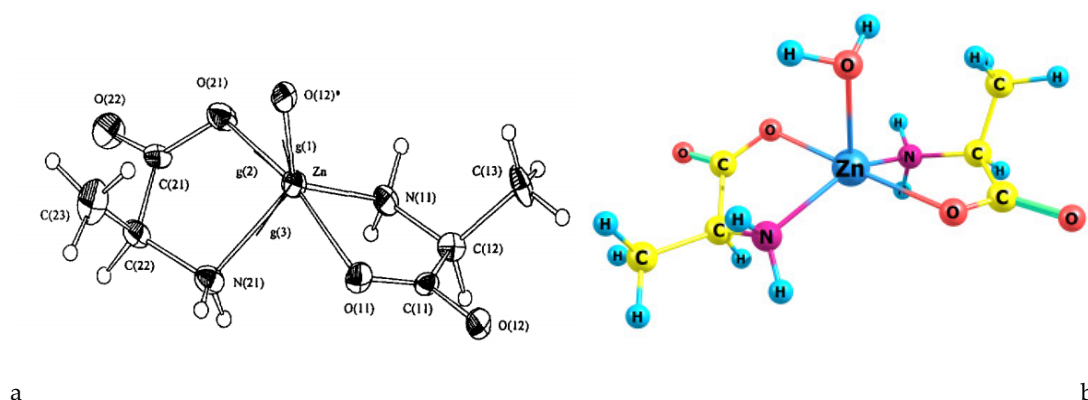

**Figure S6.** The structure of complex  $[\text{Zn}(\text{S-Ala})_2(\text{H}_2\text{O})]$  (**2b**) by X-Ray [36] (a), by DFT calculation (b).

#### M06/6-311+G(d) (Solvent = Water)

Bis-*trans*- $[\text{Zn}(\text{S-Ala})_2(\text{H}_2\text{O})]$  (**2b**) (*ta-te*)

|    |          |          |          |   |          |          |          |
|----|----------|----------|----------|---|----------|----------|----------|
| 6  | 3.89373  | -0.35992 | -0.53565 | 8 | 0.62968  | 2.38817  | 0.04443  |
| 6  | 3.11238  | -1.67919 | -0.54398 | 6 | -0.55358 | 2.60018  | -0.35706 |
| 8  | 3.69917  | -2.70713 | -0.92007 | 8 | -1.08796 | 3.71739  | -0.45998 |
| 8  | 1.88924  | -1.63045 | -0.20595 | 7 | -0.56053 | 0.21876  | -0.98751 |
| 7  | 3.21527  | 0.62342  | 0.32698  | 6 | -1.41259 | 1.37753  | -0.69137 |
| 1  | 3.49274  | 0.46676  | 1.29744  | 1 | -2.04375 | 1.62969  | -1.55421 |
| 1  | 3.52     | 1.56576  | 0.09193  | 6 | -2.30985 | 1.0862   | 0.51408  |
| 1  | 3.81361  | 0.02076  | -1.56443 | 1 | -1.67408 | 0.88449  | 1.38664  |
| 30 | 1.15059  | 0.3196   | 0.22343  | 1 | -2.8778  | 1.99823  | 0.73316  |
| 8  | 0.71417  | 0.06254  | 2.29651  | 1 | -1.08261 | -0.65306 | -0.90339 |
| 1  | -0.09154 | -0.45207 | 2.43325  | 1 | -0.23898 | 0.26433  | -1.95313 |
| 1  | 1.43119  | -0.44722 | 2.69653  | 6 | 5.35357  | -0.52866 | -0.17699 |
| 1  | 5.8632   | 0.44055  | -0.19708 | 1 | 5.86507  | -1.19109 | -0.87974 |
| 1  | -2.95749 | 0.24707  | 0.30715  | 1 | 5.46348  | -0.94972 | 0.83011  |

## S-2 NMR spectra of the Composites of the Zinc(II) Complexes

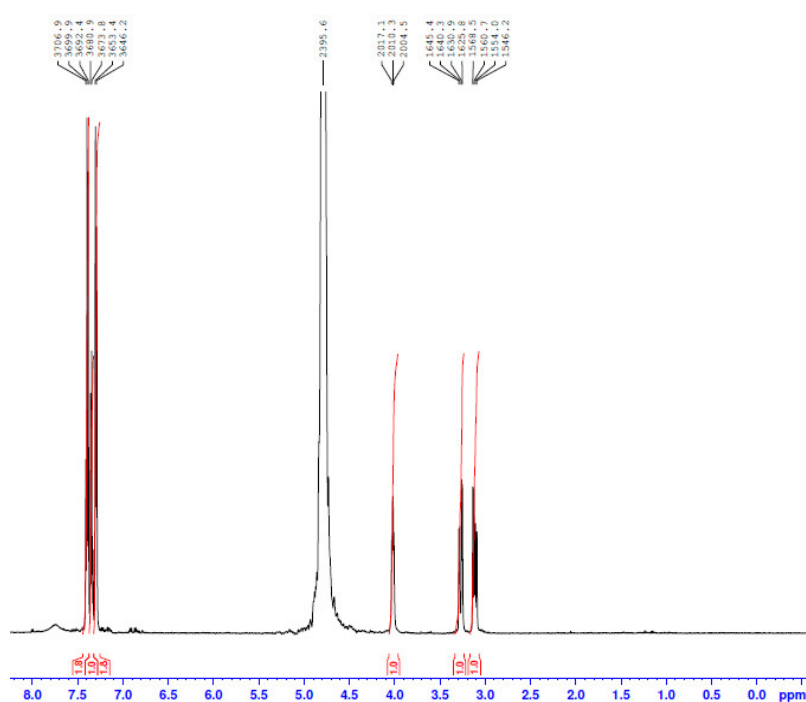

Figure S7. Complete  $^1\text{H}$  NMR spectrum of the *L*-Phenylalanine in  $\text{D}_2\text{O}$ , 500 MHz.

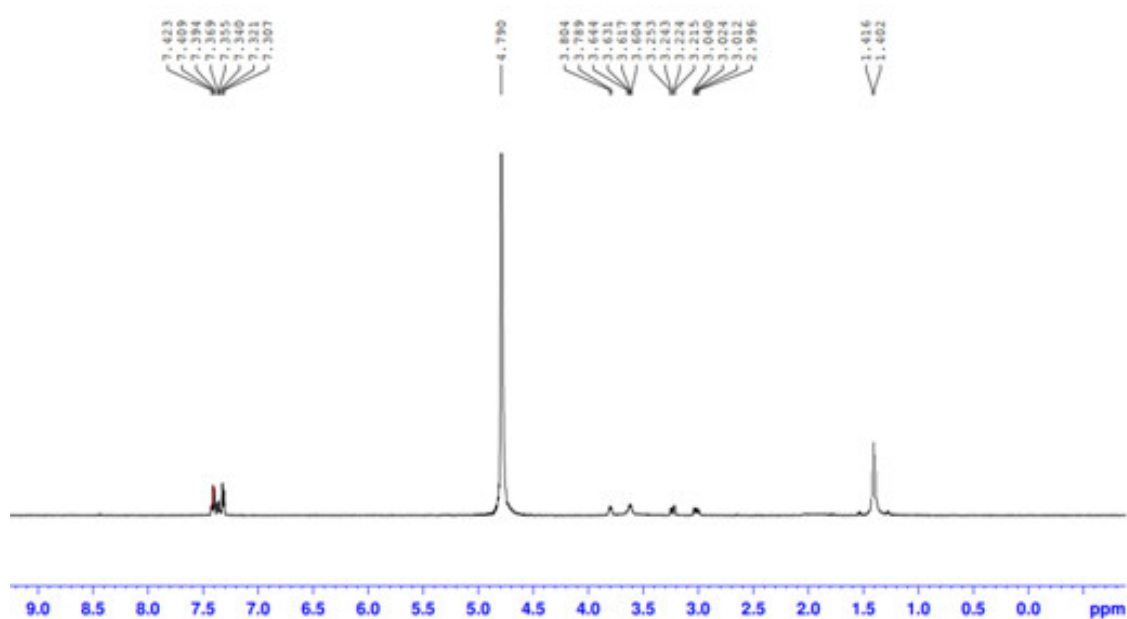

Figure S8. Complete  $^1\text{H}$  NMR spectrum of the composite  $[\text{Zn}(\text{S-Ala})_2(\text{H}_2\text{O})]\text{-}[\text{Zn}(\text{S-Phe})_2(\text{H}_2\text{O})]$  (2) in  $\text{D}_2\text{O}$ , 500 MHz.

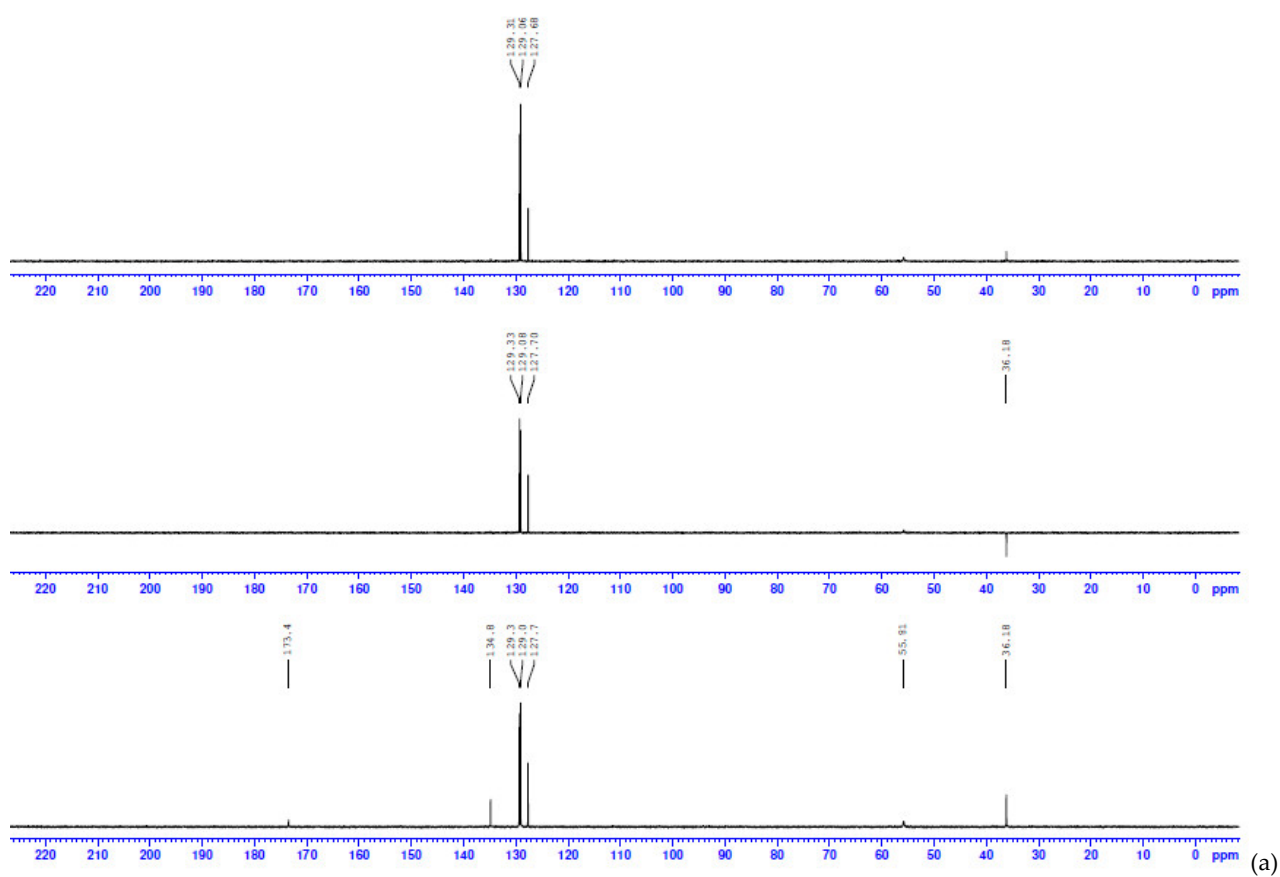

Figure S9.  $^{13}\text{C}$  NMR spectrum of the *L*-Phenylalanine in  $\text{D}_2\text{O}$ , 500 MHz.

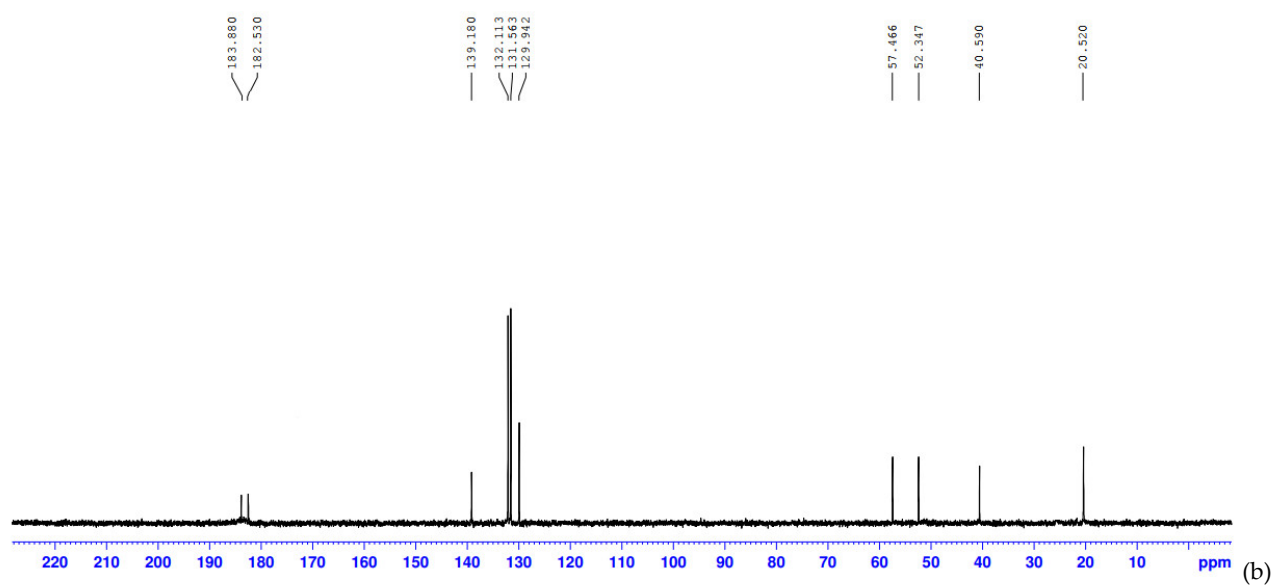

Figure S10.  $^{13}\text{C}$  NMR spectrum of the composite  $[\text{Zn}(\text{S-Ala})_2(\text{H}_2\text{O})]\text{-}[\text{Zn}(\text{S-Phe})_2(\text{H}_2\text{O})]$  (2) in  $\text{D}_2\text{O}$ , 500 MHz.
